# Supplementary material for: Dynamic stroma reorganization drives blood vessel dysmorphia during glioma growth
Source: PubMed Central journal article supplement (PMC5709745; doi:10.15252/emmm.201607445), 2017-10-16
Supplement: EMMM-9-1629-s001.pdf [file EMMM-9-1629-s001.pdf]

## Appendix

### Authors:

Thomas Mathivet<sup>1,2,12</sup>; Claire Bouleti<sup>1,2</sup>; Matthias Van Woensel<sup>3</sup>; Fabio Stanchi<sup>1,2</sup>; Tina Verschuere<sup>3</sup>; Li-Kun Phng<sup>1,2,4</sup>; Joost Dejaegher<sup>3</sup>; Marly Balcer<sup>1,2</sup>; Ken Matsumoto<sup>1,2</sup>; Petya Georgieva<sup>1,2</sup>; Jochen Belmans<sup>3</sup>; Raf Sciot<sup>5</sup>; Christian Stockmann<sup>6</sup>; Massimiliano Mazzone<sup>7,8</sup>; Steven De Vleeschouwer<sup>3,9</sup>; Holger Gerhardt<sup>1,2,10,11,12</sup>.

### Affiliations:

<sup>1</sup> Vascular Patterning Lab, Center for Cancer Biology, VIB, Leuven, Belgium

<sup>2</sup> Vascular Patterning Lab, Department of Oncology, KU Leuven, Leuven, Belgium

<sup>3</sup> Department of Neurosciences, Laboratory of Experimental Neurosurgery and Neuroanatomy, KU Leuven, Leuven, Belgium

<sup>4</sup> Laboratory for Vascular Morphogenesis, RIKEN Center for Developmental Biology, Kobe, Japan.

<sup>5</sup> Department of Pathology, KU Leuven and University Hospitals Leuven, Leuven, Belgium.

<sup>6</sup> UMR 970, Paris Cardiovascular Research Center, Institut National de la Santé et de la Recherche Médicale (INSERM), Paris, France

<sup>7</sup> Lab of Molecular Oncology and Angiogenesis, Department of Oncology, KU Leuven, Leuven, Belgium

<sup>8</sup> Lab of Molecular Oncology and Angiogenesis, Center for Cancer Biology, VIB, Leuven, Belgium

<sup>9</sup> Department of Neurosciences, KU Leuven, Leuven, Belgium

<sup>10</sup> Integrative Vascular Biology Laboratory, Max-Delbrück-Center for Molecular Medicine in the Helmholtz Association (MDC), 13125 Berlin, Germany

<sup>11</sup> Berlin Institute of Health (BIH), Berlin, Germany.

<sup>12</sup> Corresponding authors.



## Table of content:

### Appendix figures:

**Appendix Figure S1 linked to Figure 2** (*Immune cells recruitment in glioma*).

**Appendix Figure S2 linked to Figure 2** (*LifeAct-GFP bone marrow transplant and CSF1R-Mer-Cre-Mer-GFP labeled macrophages are specific from bone marrow derived macrophages and do not label resident macrophages*).

**Appendix Figure S3 linked to Figure 2** (*Bone marrow derived macrophage proliferation in the glioma microenvironment*).

**Appendix Figure S4 linked to Figure 2** (*Iba1 positive resident macrophages mainly stay at the glioma margin compared to tumor core invading bone marrow derived F4/80 positive macrophages*).

**Appendix Figure S5 linked to Figure 3** (*MHCII and MRC1 are segregating markers of M1 and M2 macrophages respectively*).

**Appendix Figure S6 linked to Figure 4** (*Blood vessel leakage in late stage glioma in human*).

**Appendix Figure S7 linked to Figure 5** (*Concomitant neutrophils and myeloid-derived suppressor cells (MDSCs) recruitment with macrophages recruitment inhibition*).

**Appendix Figure S8 linked to Figure 7** (*Hypoxic area increases during glioma growth*).

**Appendix Figure S9 independent** (*anti-CSF1 treatment reduce vessel caliber and slightly increase tumor growth in melanoma model*).

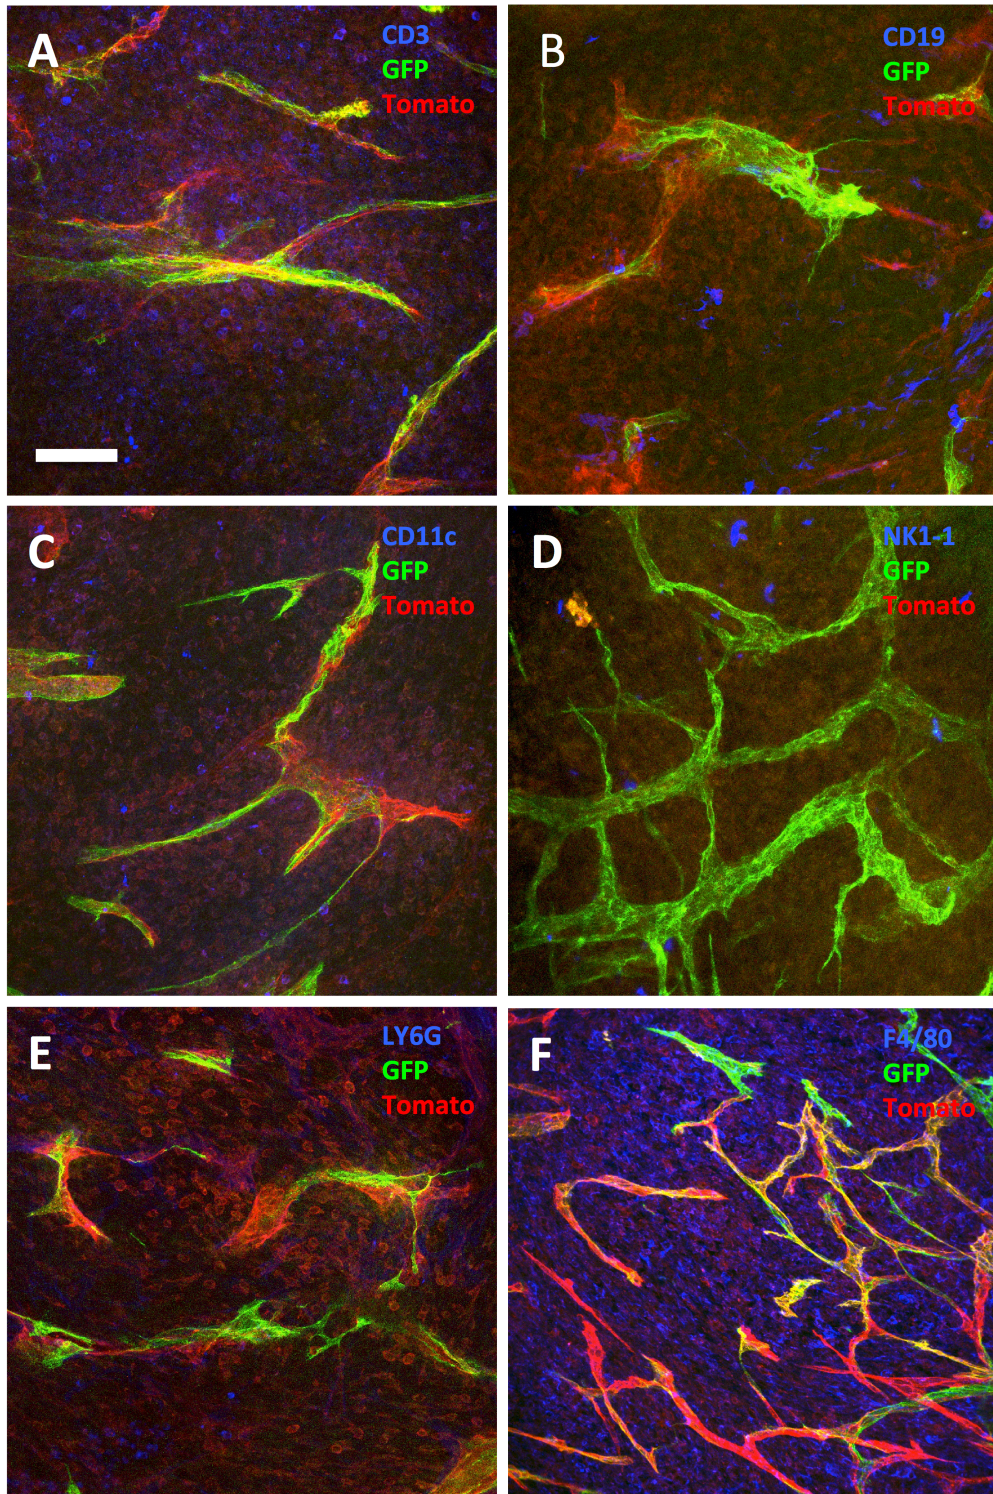

**Appendix Figure S1: Immune cells recruitment in glioma.** CD3 (A), CD19 (B), CD11c (C), NK1-1 (D), LY6G (E) and F4/80 (F) immunohistochemistry on 5 weeks growth glioma section implanted in  $ROSA^{mTmG}::Pdgbf-iCre$  mouse respectively staining T-cells, B-cells, dendritic cells, natural killer cells, neutrophils and macrophages (50 $\mu$ m depth stack). Scale bar: 80 $\mu$ m.



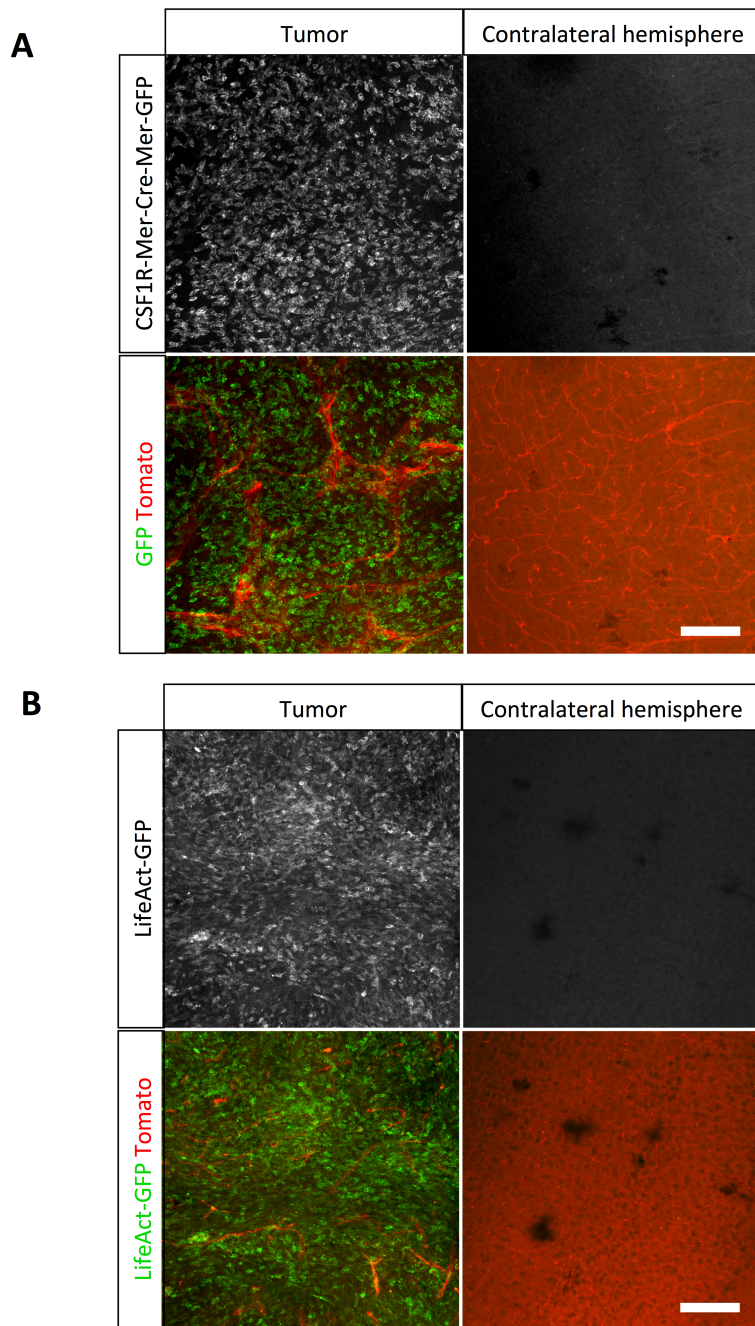

**Appendix Figure S2: LifeAct-GFP bone marrow transplant and CSF1R-Mer-Cre-Mer-GFP labeled macrophages are specific from bone marrow derived macrophages and do not label resident macrophages. A.** Confocal imaging of LifeAct-GFP bone marrow transplantation in the tumor and the contralateral hemisphere of 5 weeks implanted glioma in  $ROSA^{mT/mG}$  mice. **B.** Confocal imaging of the tumor and the contralateral hemisphere of 5 weeks implanted glioma in  $ROSA^{mTmG}::Csf1r-Mer-iCre-Mer$  mouse. Scale bar: 150 $\mu$ m.

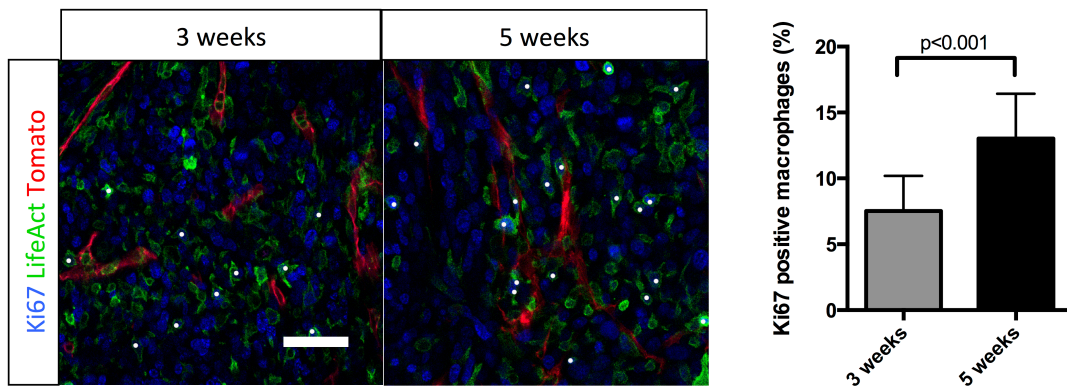

**Appendix Figure S3: Bone marrow derived macrophage proliferation in the glioma microenvironment.** Ki67 immunohistochemistry on 3 and 5 weeks growth glioma of LifeAct-GFP bone marrow transplantation in ROSA<sup>mT/mG</sup> mice (n=4 mice per group) (50 $\mu$ m depth stack). Statistical analysis: t-test. Error bars: mean $\pm$ SD. Scale bars: 100 $\mu$ m.

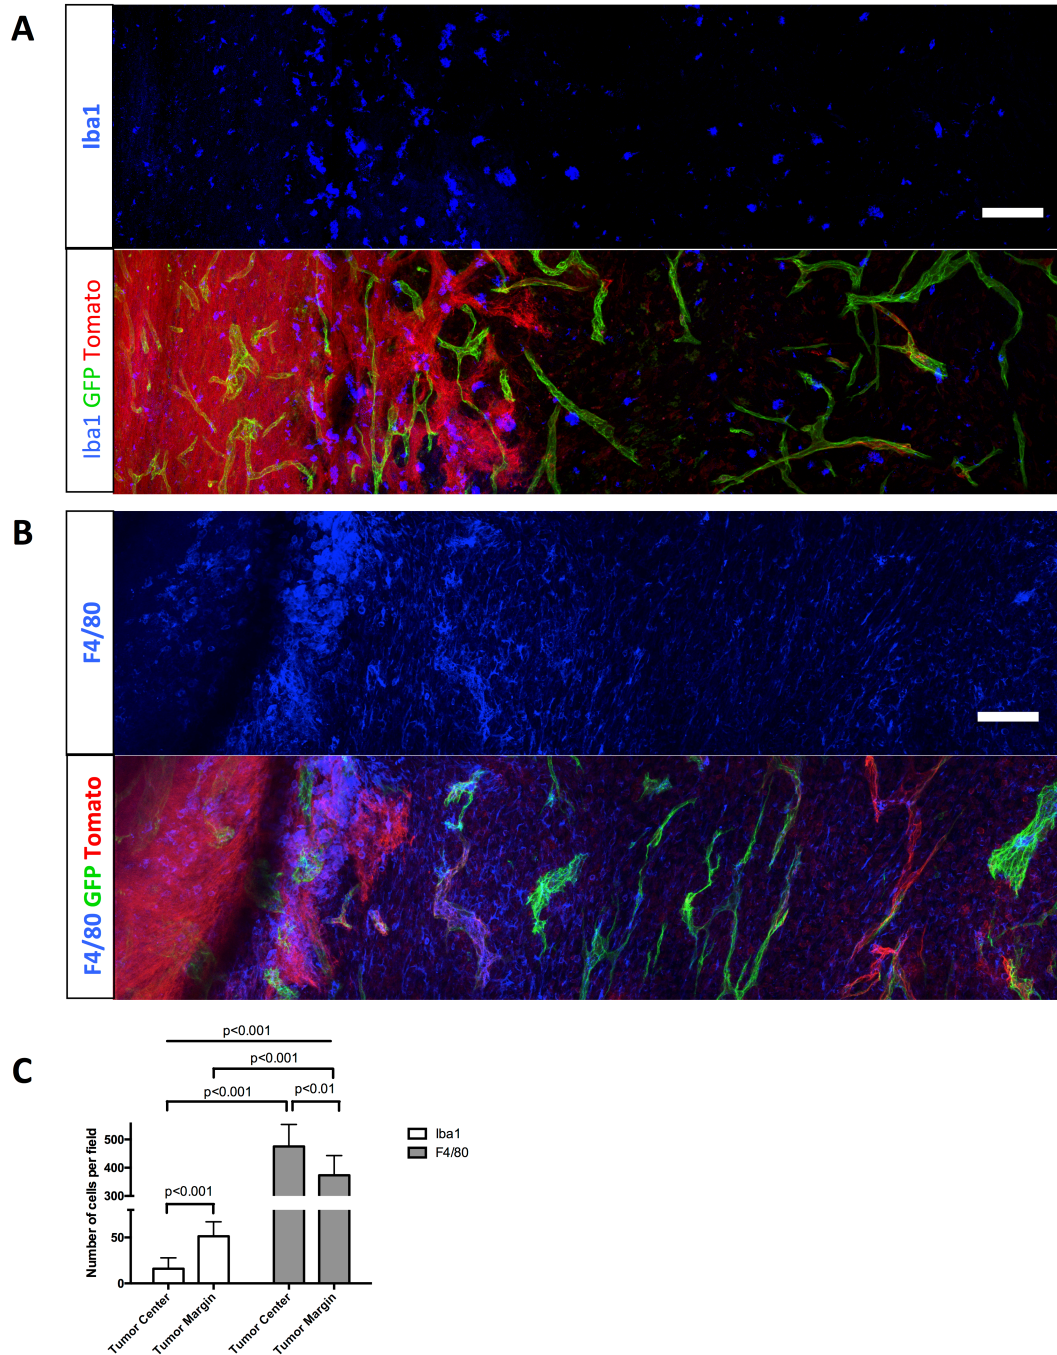

**Appendix Figure S4: Iba1 positive resident macrophages mainly stay at the glioma margin compared to tumor core invading bone marrow derived F4/80 positive macrophages.** Iba1 (A) and F4/80 (B) immunohistochemistry 5 weeks growth glioma in ROSA<sup>mTmG</sup>::*Pdgfb-iCre* mouse (50µm depth stack). C. Quantification of Iba1 or F4/80 positive cells in tumor center or tumor margin areas. Statistical analysis: C. two-way ANOVA followed by multiple comparisons Tukey's test. Error bars: mean±SD. Scale bar: 250µm.



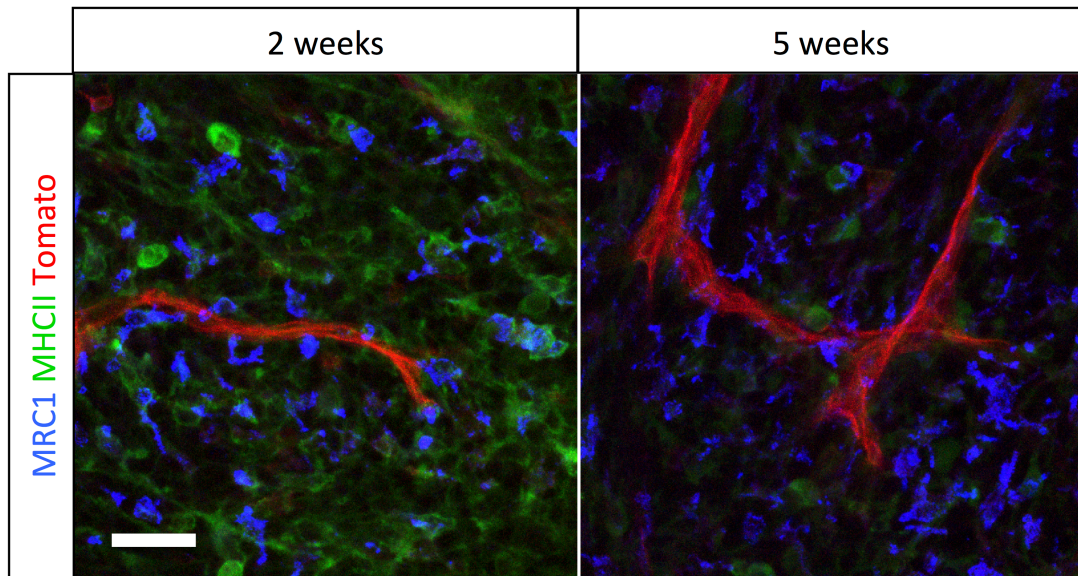

**Appendix Figure S5: MHCII and MRC1 are segregating markers of M1 and M2 macrophages respectively.** MHCII and MRC1 immunohistochemistry on 2 and 5 weeks growth glioma in  $ROSA^{mTmG}::Pdgfb-iCre$  mouse (20 $\mu$ m depth stack). Scale bar: 80 $\mu$ m.

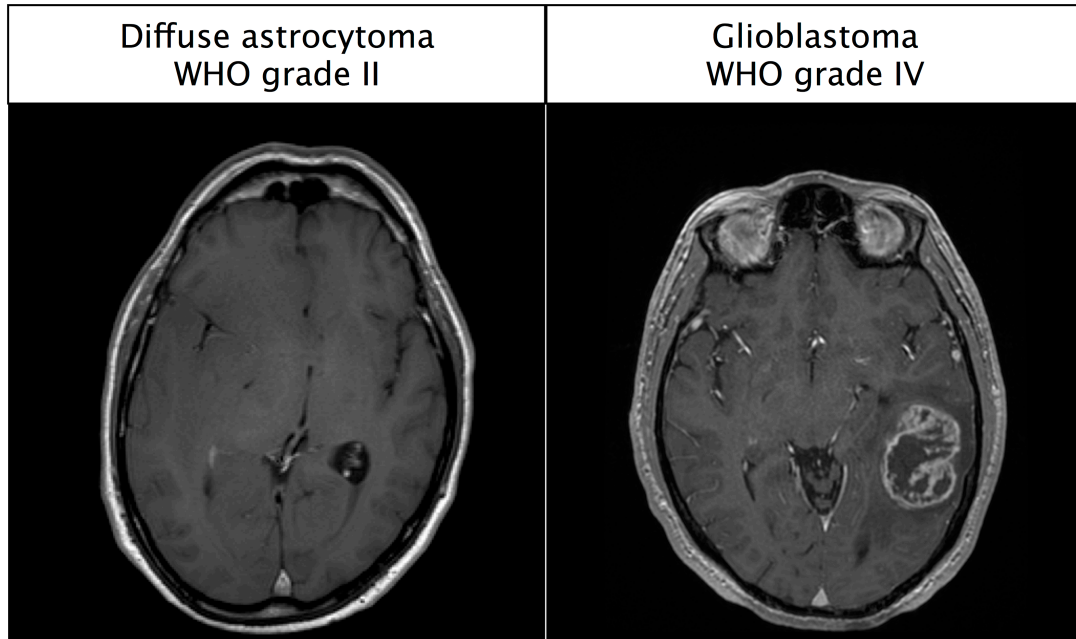

**Appendix Figure S6: Blood vessel leakage in late stage glioma in human.** MRI imaging in gadolinium administered patient bearing grade II and grade IV glioma. Gadolinium extravasates from the blood stream in glioblastoma (grade IV) but not in glioma grade II.

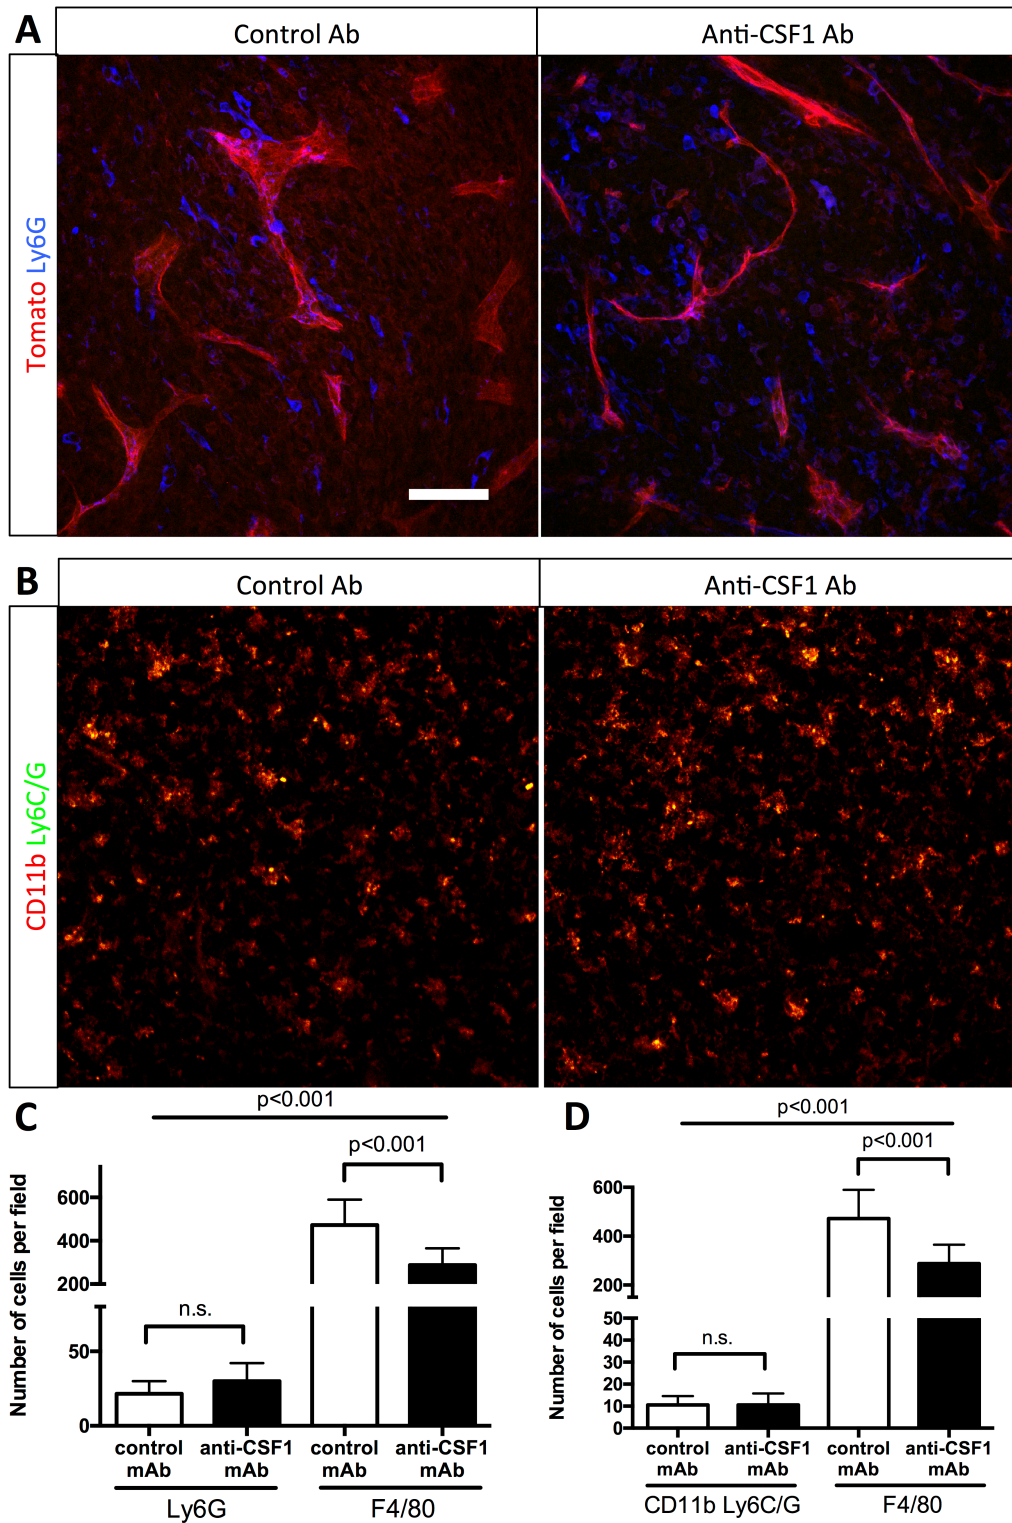

**Figure S7: Concomitant neutrophils and myeloid-derived suppressor cells (MDSCs) recruitment with macrophages recruitment inhibition. A.** Ly6G immunohistochemistry on sections of 4 weeks growth glioma in ROSA<sup>mT/mG</sup> mice treated with anti-CSF1 or control antibodies (50 $\mu$ m depth stack). **B.** CD11b Ly6C/G immunohistochemistry on sections of 4 weeks



growth glioma treated with anti-CSF1 or control antibodies (50 $\mu$ m depth stack). **C.** Quantification of Ly6G positive cells in response to anti-CSF1 mAb treatment in comparison to F4/80 positive cells. Anti-CSF1 antibody treatment induces a tendential 1.4 fold increase in neutrophil recruitment compared to control antibody (n=6 mice per group) **D.** Quantification of CD11b Ly6C/G positive cells in response to anti-CSF1 treatment in comparison to F4/80 positive cells. Anti-CSF1 antibody treatment did not affect MDSCs recruitment compared to control antibody (n=6 mice per group). Statistical analysis: C.D. one-way ANOVA followed by multiple comparisons Tukey's test. Error bars: mean $\pm$ SD. Scale bar: 70 $\mu$ m.

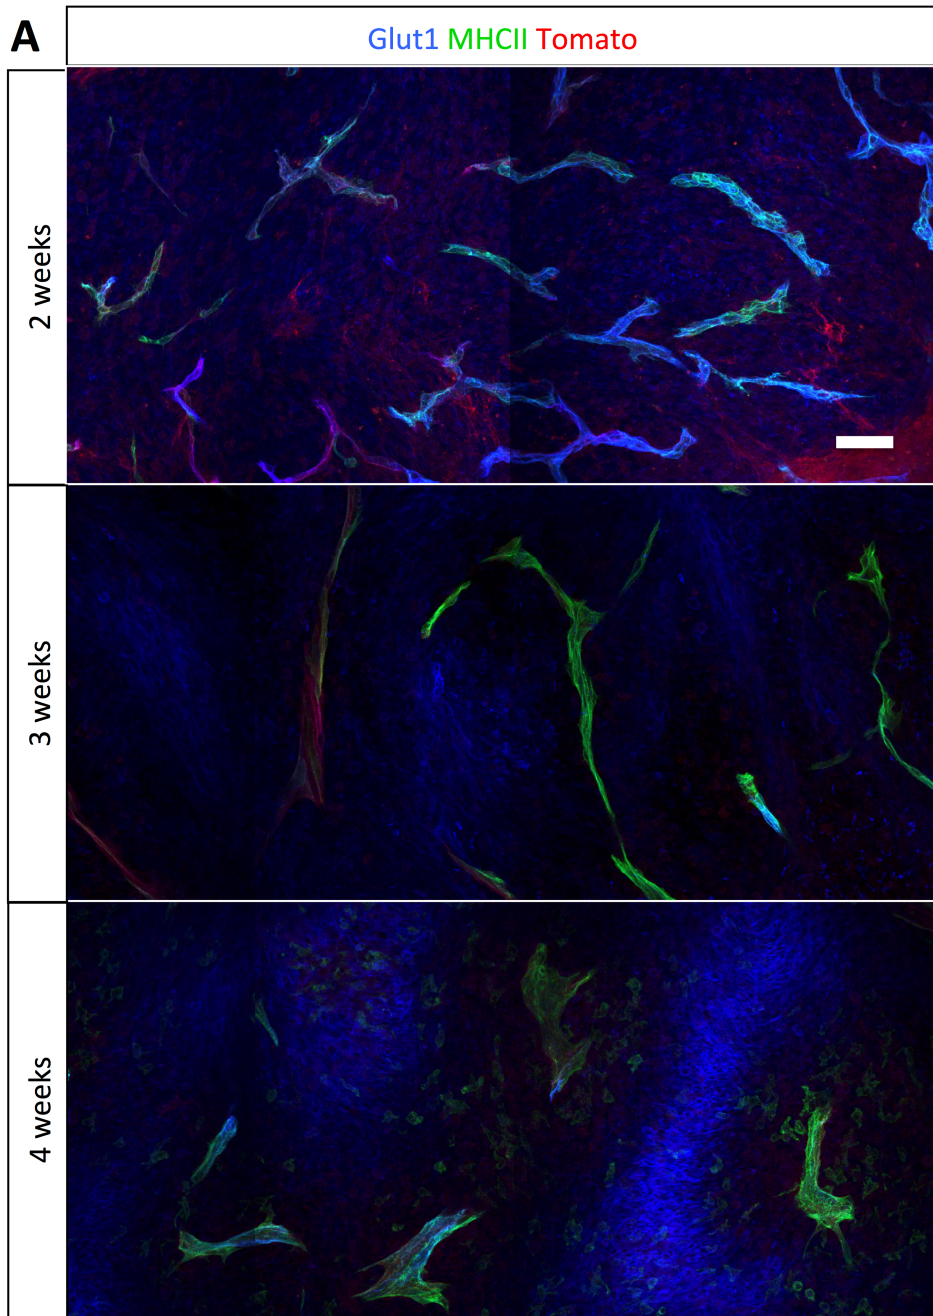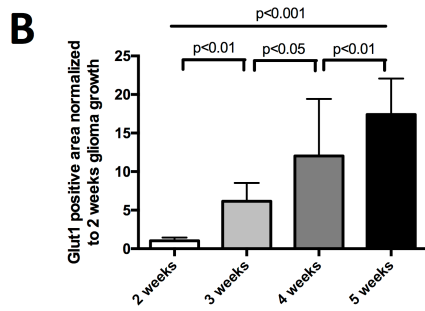

**Appendix Figure S8: Hypoxic area increases during glioma growth. A.** Glut1 immunohistochemistry on 1, 3 and 4 weeks growth glioma section implanted in ROSA<sup>mTmG</sup>::*Pdgfb-iCre* mouse. Glut1 positive hypoxic regions extend during glioma progression. Note that 2 weeks glioma growth vessels are still largely covered by Glut1 labeling indicating the functionality of the blood brain barrier (50 $\mu$ m depth stack). **B.** Glut1 hypoxic area quantification during glioma growth (n=5 mice per group). Statistical analysis: B. one-way ANOVA followed by multiple comparisons Tukey's test. Error bars: mean $\pm$ SD. Scale bar: 200 $\mu$ m.

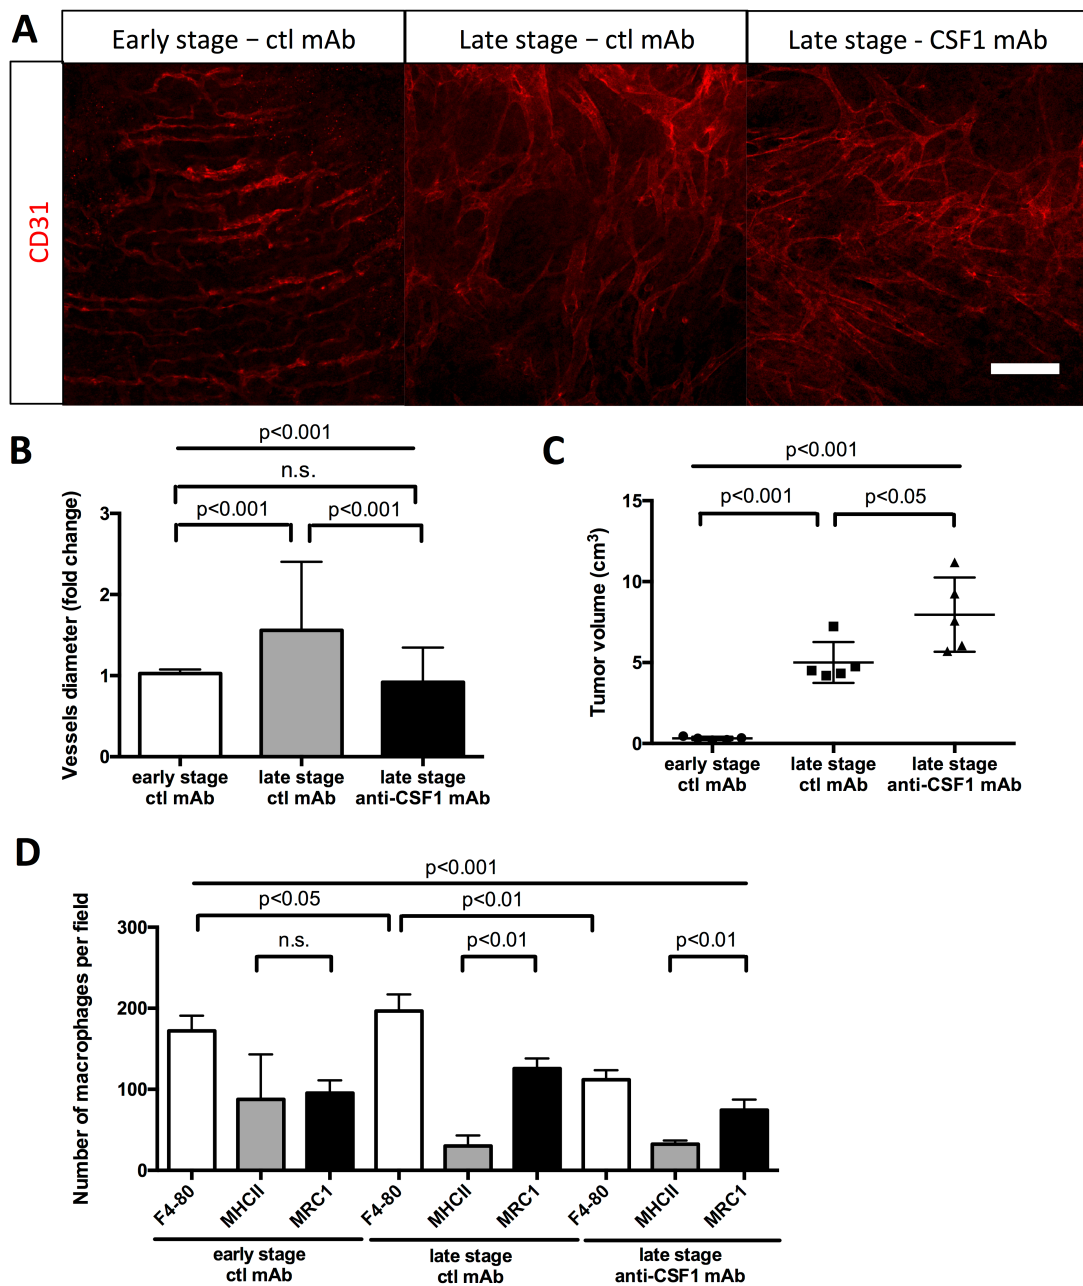

**Appendix Figure S9: anti-CSF1 treatment reduce vessel caliber and slightly increase tumor growth in melanoma model. A.** CD31 immunohistochemistry on sections of early (4 days) and late (12days) melanomas treated with anti-CSF1 mAb or control mAb. **B.** Blood vessels diameter quantification in melanoma tumor model in response to anti-CSF1

mAb treatment. Anti-CSF1 antibody treatment induces a 1.7 fold decrease in vessel caliber compared to control antibody (n=5 mice per group) (50 $\mu$ m depth stack). **C.** Tumor volume analysis over tumor progression in response to anti-CSF1 mAb. **D.** F4/80, MHCII and MRC1 immunohistochemistry on early and late stage growth melanoma sections implanted in wild-type bl6 mouse and in response to anti-CSF1 mAb. M1 macrophages are as abundant as M2 macrophages at early stage and their number decreases at late stage. M2 macrophages accumulate over tumor progression. Anti-CSF1 mAb treatment decrease macrophages population in melanoma tumor model, but doesn't seems to orientate macrophages polarity. Statistical analysis: B.C.D. one-way ANOVA followed by multiple comparisons Tukey's test. Error bars: mean $\pm$ SD. Scale bar: 70 $\mu$ m.
