# Supplementary material for: Dynamic stroma reorganization drives blood vessel dysmorphia during glioma growth
Source: PubMed Central journal article supplement (PMC5709745; doi:10.15252/emmm.201607445), 2017-10-16
Supplement: EMMM-9-1629-s002.pdf [file EMMM-9-1629-s002.pdf]

## Expanded View Figures

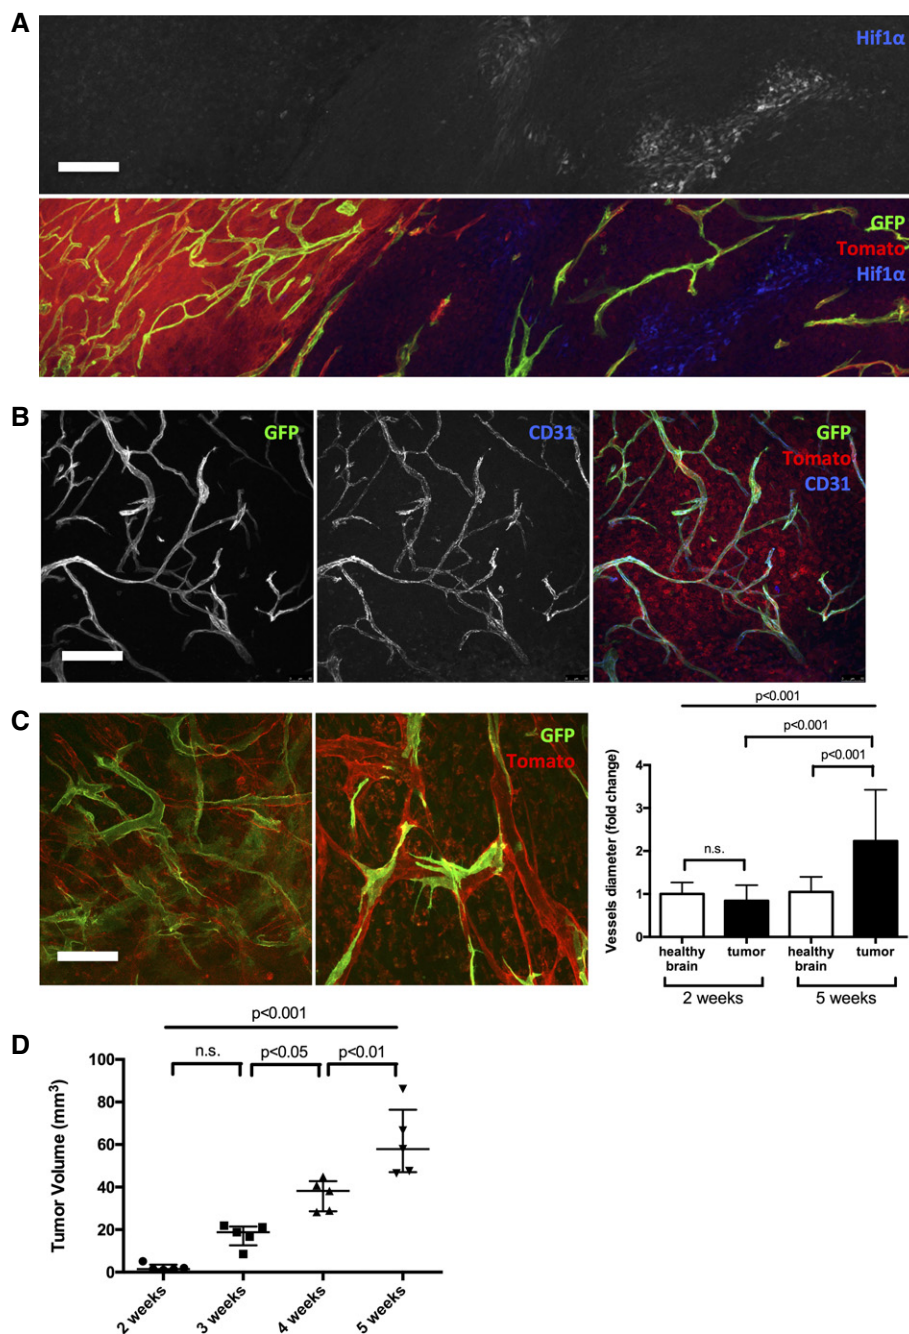

**Figure EV1. Blood vessel dysmorphia arises during glioma growth.**

- A HIF1 $\alpha$  immunohistochemistry on 5-week growth glioma in ROSA<sup>mTmG</sup>::*Pdgfb-iCre* mouse (50- $\mu$ m depth stack).
- B CD31 immunohistochemistry on 5-week growth glioma in ROSA<sup>mTmG</sup>::*Pdgfb-iCre* mouse revealing the endothelial cell specificity of the *Pdgfb-iCre* induced recombination (50- $\mu$ m depth stack).
- C Representative images of two-photon live imaging on 2- and 5-week growth glioma implanted in ROSA<sup>mTmG</sup>::*Cdh5-iCre* mouse (350- $\mu$ m depth stack). Note differences in network complexity and the quantified vessel diameter increase ( $n = 6$  mice per group).
- D Tumor volume quantification during glioma growth ( $n = 5$  mice per group).

Data information: Statistical analysis: (C, D) one-way ANOVA followed by multiple comparisons Tukey's test. Error bars: (C) mean  $\pm$  SD; (D) median interquartile. Scale bars: (A) 250  $\mu$ m; (B, C) 150  $\mu$ m.

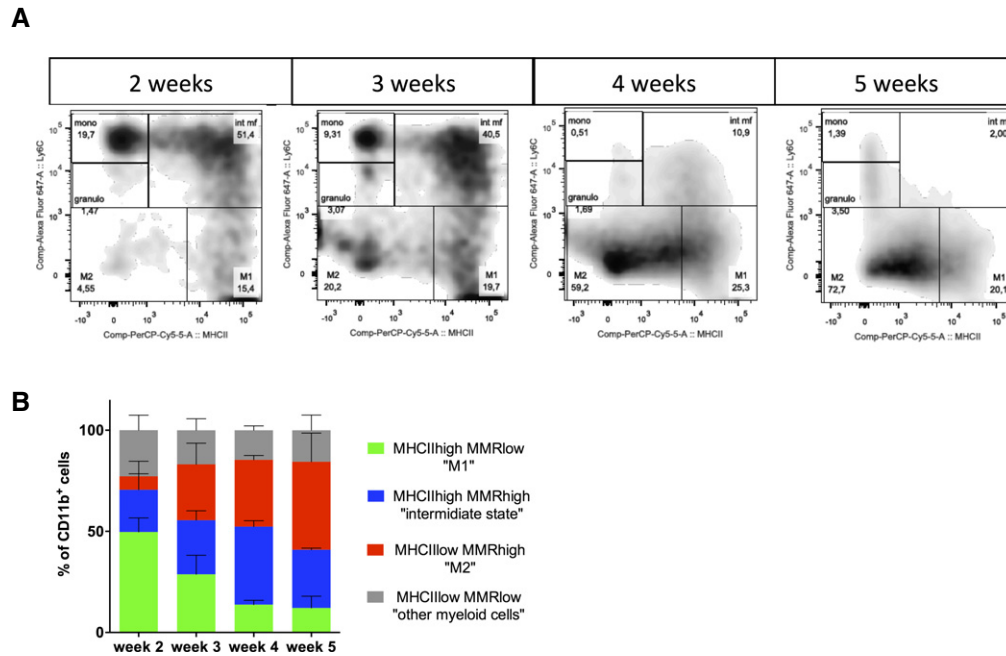

**Figure EV2. Macrophage polarization FACS analysis.**

A Identification of distinct myeloid subsets in single-cell suspensions of 2-, 3-, 4-, and 5-week glioma (subsets in gated CD11b<sup>+</sup> cells).

B Flow cytometry analysis confirming a switch in macrophages polarization over glioma growth ( $n = 3$  mice per group). Error bars: mean  $\pm$  SD.

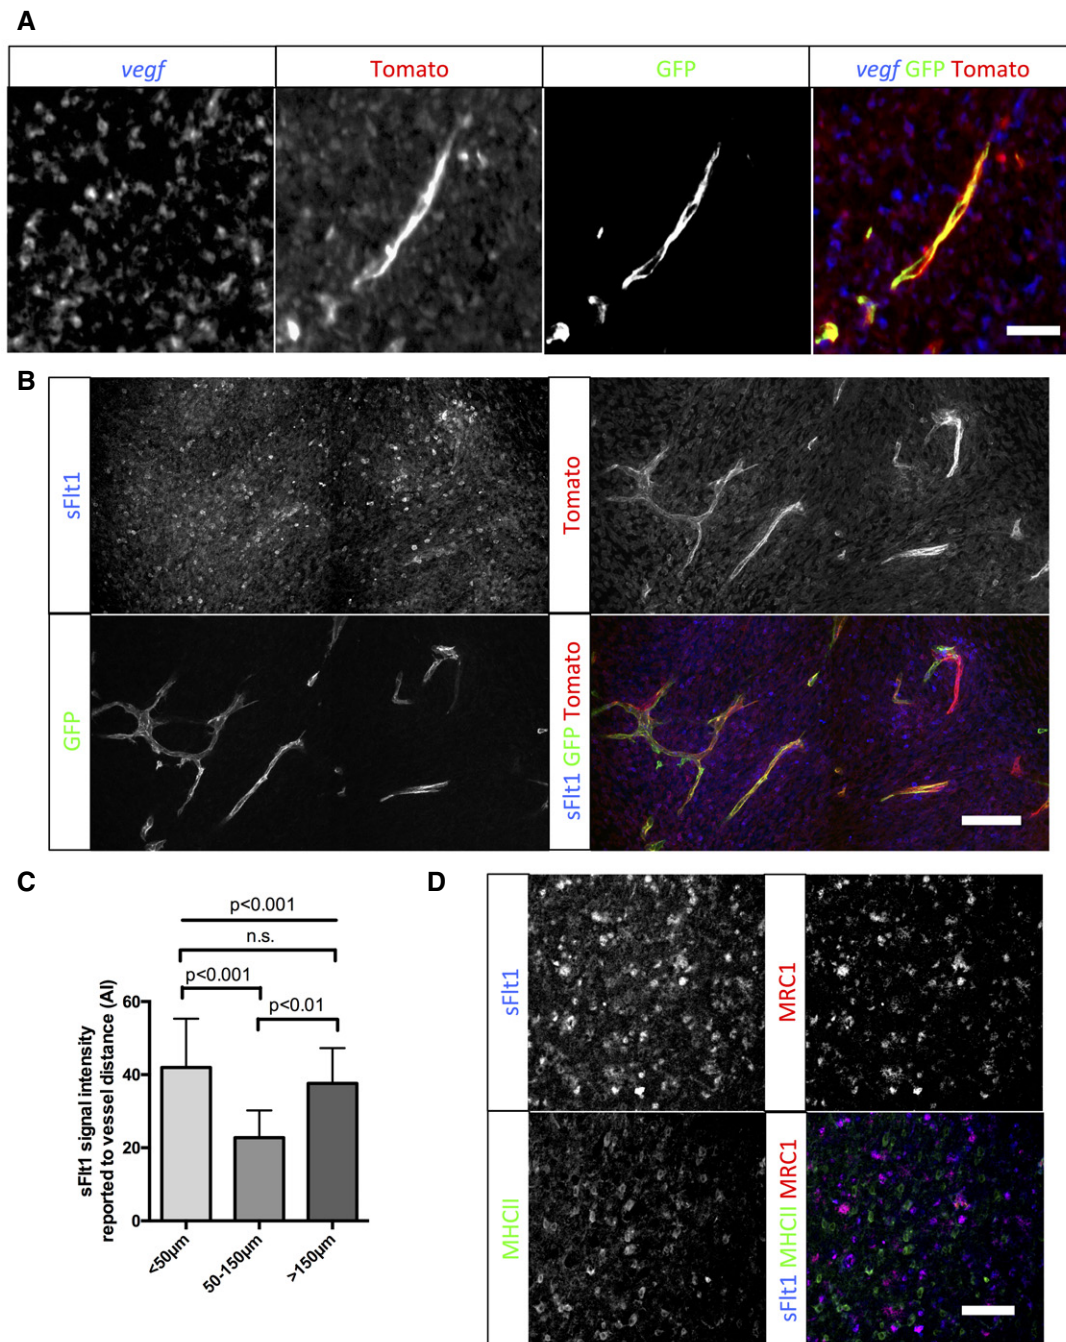

**Figure EV3. Late-stage glioma M2 macrophages express and present VEGF close to blood vessels.**

- A *vegf* *in situ* hybridization on sections of 5-week growth glioma in ROSA<sup>mTmC::Pdgfrb-iCre</sup> mouse. Tomato-positive macrophages surrounding blood vessels are positive for the *vegf*-specific RNA probe (5-µm depth stack).
- B sFlt1 binding assay on section of 5-week growth glioma in ROSA<sup>mTmC::Pdgfrb-iCre</sup> mouse. At late-stage tumor growth, M2 macrophages surrounding blood vessels present very high amounts of VEGF (binding sFlt1) to the neighboring endothelial cells (50-µm depth stack).
- C Quantification of sFlt1 binding accordingly to vessel distance ( $n = 5$  mice).
- D sFlt1 binding assay together with MHCII and MRC1 immunohistochemistry on section of 3-week growth glioma in wild-type mice. sFlt1 binds to MRC1-positive macrophages, but not MHCII-positive macrophages ( $n = 5$  mice per group).

Data information: Statistical analysis: (C) one-way ANOVA followed by multiple comparisons Tukey's test. Error bars: mean  $\pm$  SD. Scale bars: (A) 50 µm; (B) 250 µm; (D) 150 µm.



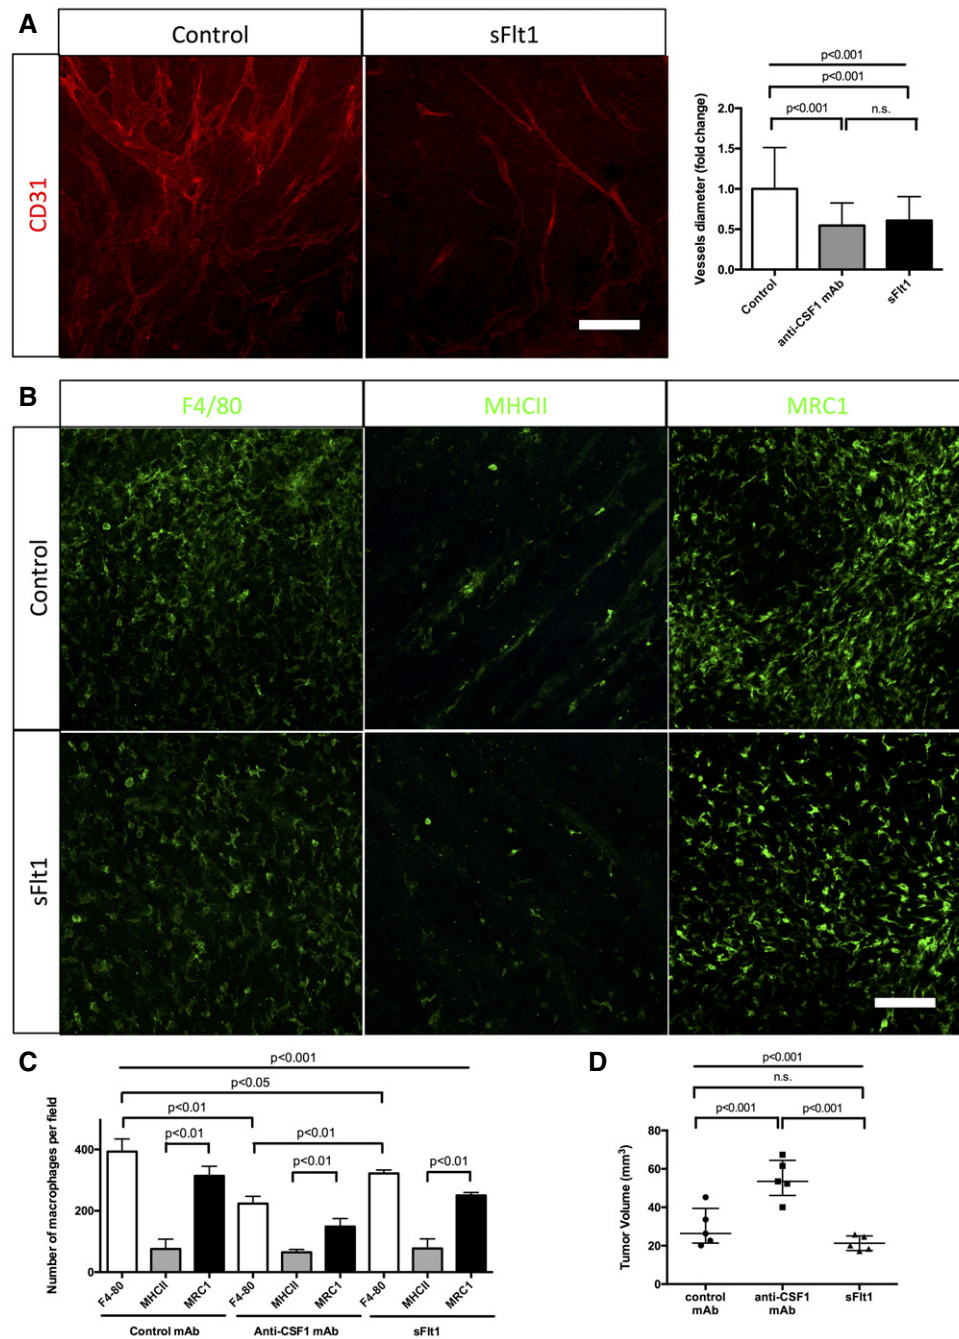

**Figure EV4. VEGF trapping with sFlt1 treatment normalizes the vasculature and reduces macrophages recruitment without significantly affecting tumor growth.**

A CD31 immunohistochemistry on sections of 4-week growth glioma from mice treated with sFlt1. As for anti-CSF1 antibody treatment, sFlt1 treatment induces a twofold decrease in vessel caliber compared to control antibody ( $n = 5$  mice per group) (50- $\mu\text{m}$  depth stack). Blood vessels significantly dilate over tumor growth.

B F4/80, MHCII, and MRC1 immunohistochemistry on early- and late-stage growth melanoma sections implanted in wild-type bl6 mouse. M1 macrophages are as abundant as M2 macrophages at early stage and their number decreases at late stage. M2 macrophages accumulate over tumor progression.

C Macrophages quantification in response to sFlt1 and anti-CSF1 mAb treatments. anti-CSF1 mAb and sFlt1 treatments decrease macrophages population in melanoma tumor model, but do not seem to affect macrophages polarity ( $n = 5$  mice per group).

D Tumor volume analysis in response to sFlt1 and anti-CSF1 mAb treatments ( $n = 5$  mice per group).

Data information: Statistical analysis: (A, C, D) one-way ANOVA followed by multiple comparisons Tukey's test. Error bars: (A, C): mean  $\pm$  SD; (D) median interquartile. Scale bars: (A, B) 70  $\mu\text{m}$ .

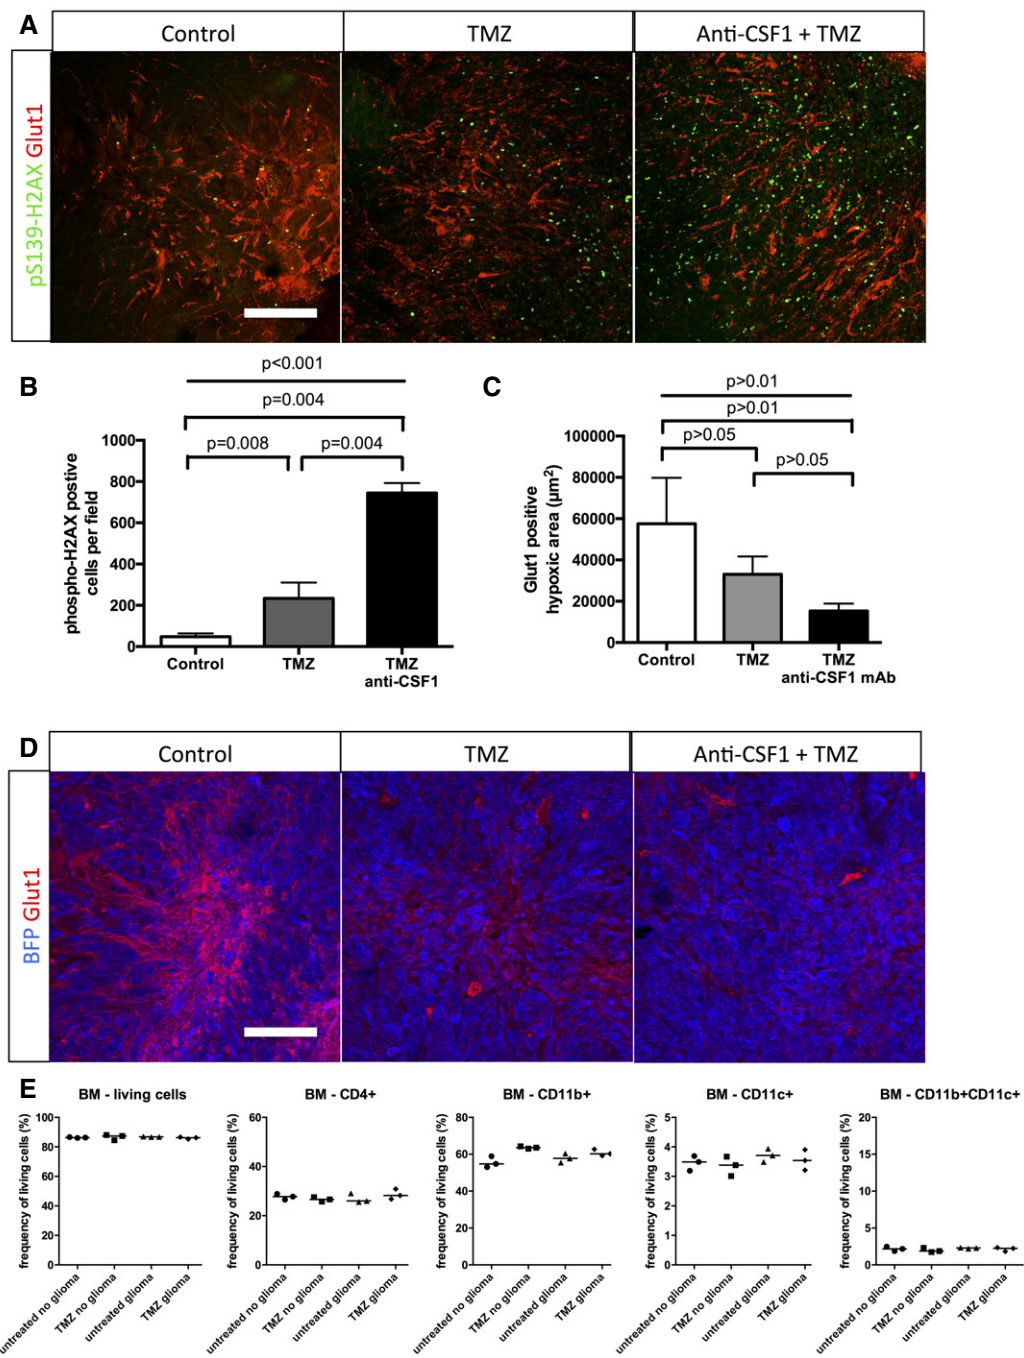

**Figure EV5. Combining macrophage depletion with chemotherapy increases DNA damage.**

A,B Phospho-H2AX and Glut1 immunohistochemistry on 3-week growth glioma in wild-type mice treated with anti-CSF1 antibody in combination with temozolomide chemotherapeutic agent induces a higher tumor cell death efficiency with (B) a significant increase in DNA damage-positive tumor cell labeled with anti-phospho-H2AX (50-µm depth stack) ( $n = 6$  mice per group).  
 C Quantification of (D). ( $n = 6$  mice per group).  
 D Glut1 immunohistochemistry on 3-week growth glioma in wild-type mice treated with anti-CSF1 antibody in combination with temozolomide chemotherapeutic agent showing a significant decrease in hypoxic area in response to temozolomide which is potentiated by anti-CSF1 Ab treatment  
 E Immune cells population analysis in bone marrow from glioma-bearing mice treated or not with temozolomide ( $n = 3$  mice per group).

Data information: Statistical analysis: (B, C) one-way ANOVA followed by multiple comparisons Tukey's test. Error bars: (B, C) mean  $\pm$  SD; (E) median. Scale bars: (A, D) 100 µm.
